# Supplementary material for: Functionalized luminescent covalent organic frameworks hybrid material as smart nose for the diagnosis of Huanglongbing
Source: Royal Society of Chemistry journal article supplement (doi:10.1039/d2tb01185a), 2022-01-01
Supplement: d2tb01185a1.pdf [file d2tb01185a1.pdf]

Electronic Supplementary Material (ESI) for Journal of Materials Chemistry B.  
This journal is © The Royal Society of Chemistry 2022

## Supporting Information

### **Functionalized luminescent covalent organic frameworks hybrid material as smart nose for the diagnosis of Huanglongbing**

Jinmin Wang,<sup>a</sup> Limin Zhao<sup>b</sup> and Bing Yan<sup>\*a</sup>

<sup>a</sup> Shanghai Key Lab of Chemical Assessment and Sustainability, School of Chemical Science and Engineering, Tongji University, Shanghai 200092, China

<sup>b</sup> School of Materials Science and Engineering, Liaocheng University, Liaocheng 252059, China

\* Corresponding author: Bing Yan, Email: byan@tongji.edu.cn.

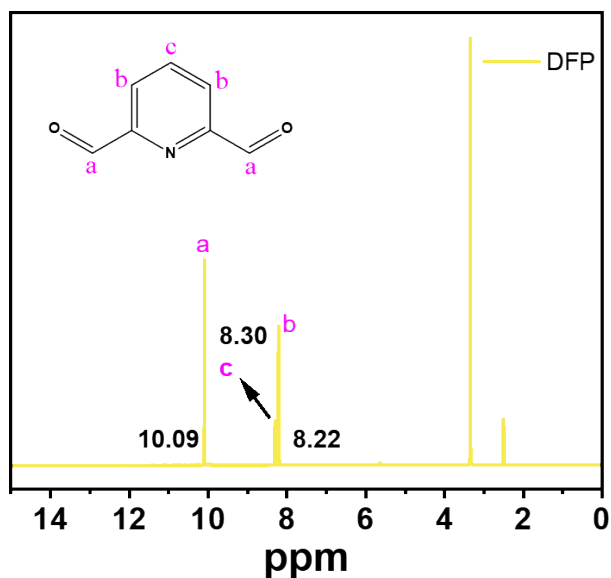

**Figure S1.**  $^1\text{H}$  NMR spectrum of monomer DFP in  $\text{DMSO-d}_6$ .

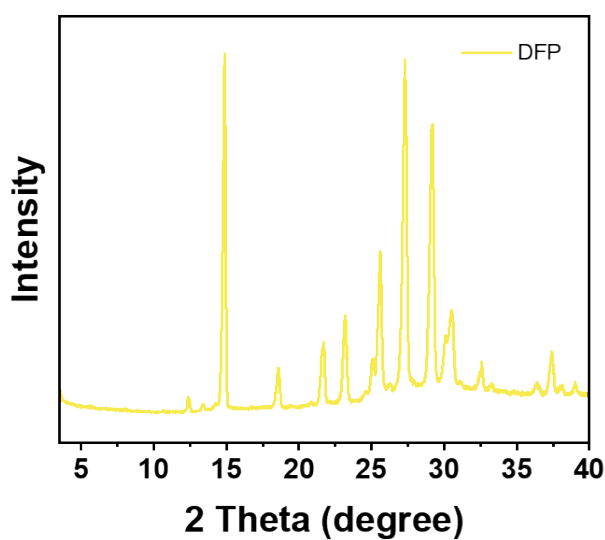

**Figure S2.** PXRD pattern of monomer DFP.

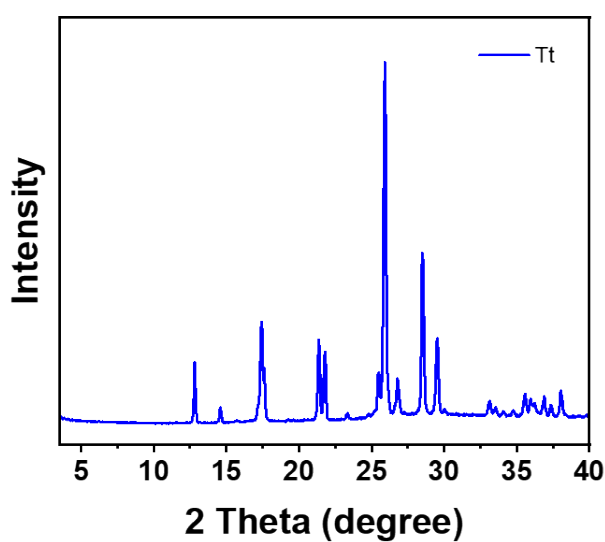

**Figure S3.** PXRD pattern of monomer Tt.

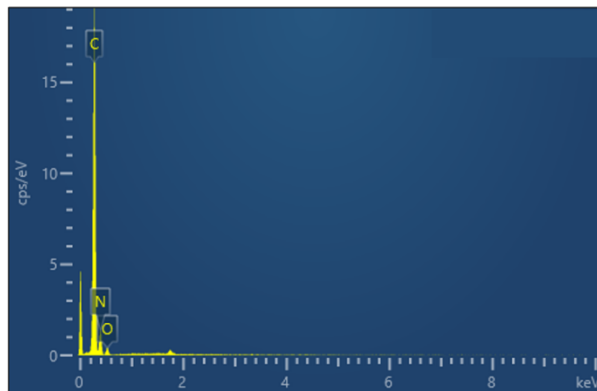

**Figure S4.** The EDS spectrum of TtDFP.

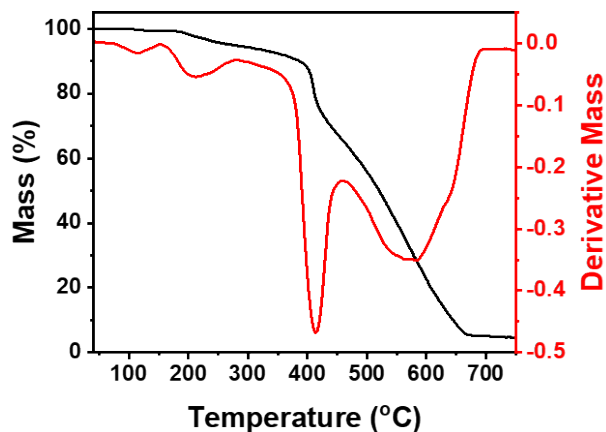

**Figure S5.** The TG and DTG curve of TtDFP at temperature range of 40–750 °C.

**Table S1.** The weight percentage of all elements in TtDFP and Eu<sup>3+</sup>@TtDFP determined by EDS.

| Element | Percentage by weight |                         |
|---------|----------------------|-------------------------|
|         | TtDFP                | Eu <sup>3+</sup> @TtDFP |
| C       | 69.99                | 38.28                   |
| N       | 20.89                | 27.79                   |
| O       | 9.12                 | 18.77                   |
| Eu      |                      | 15.16                   |

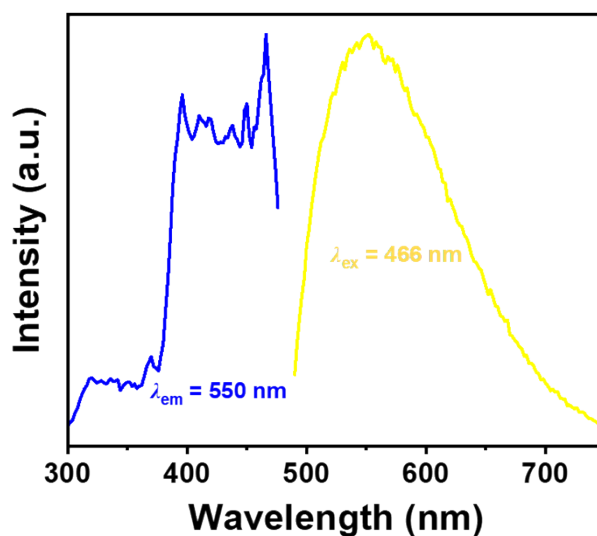

**Figure S6.** Excitation and emission spectra of solid DFP.

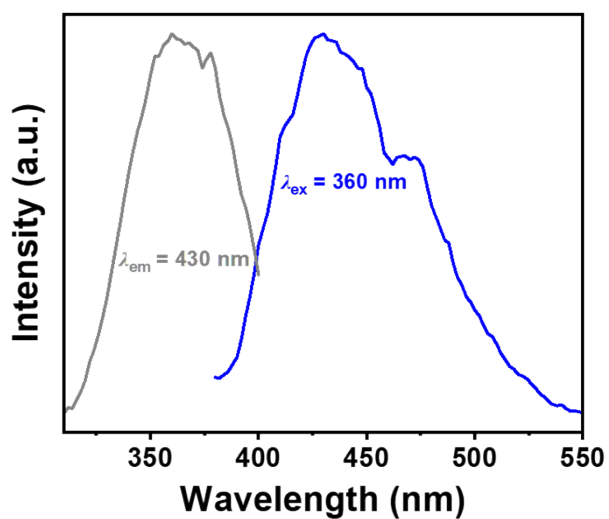

**Figure S7.** Excitation and emission spectra of solid Tt.

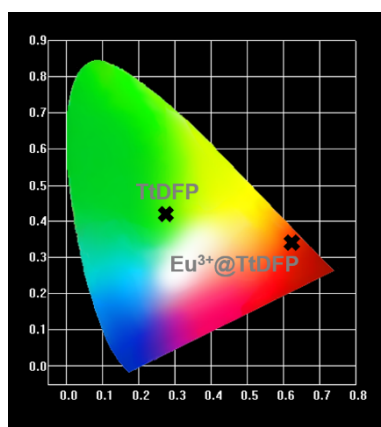

**Figure S8.** CIE coordinates of solid TtDFP and  $\text{Eu}^{3+}$ @TtDFP.

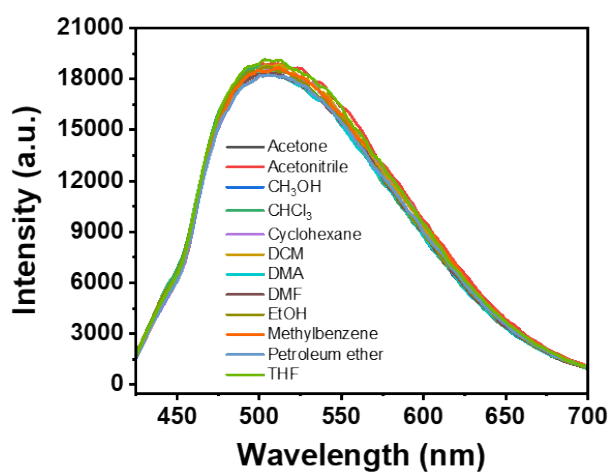

**Figure S9.** Fluorescence spectra of TtDFP in different common organic solvents.

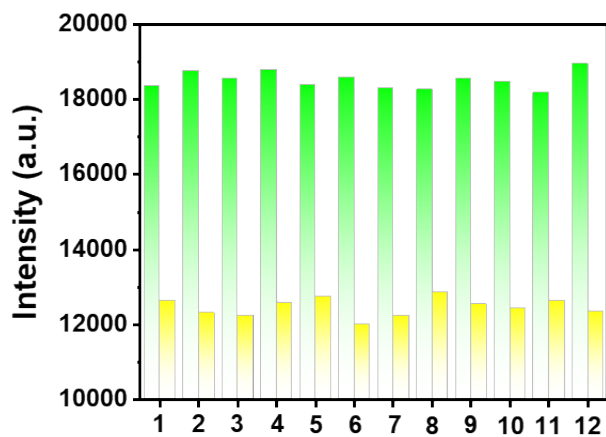

**Figure S10.** The histogram ( $I_{500}$ ) of TtDFP in different solvents (green bar) and after added 3.0 wt% water (yellow bar) (Solvents 1–12: Acetone, Acetonitrile,  $\text{CH}_3\text{OH}$ ,  $\text{CHCl}_3$ , Cyclohexane, DCM, DMA, DMF, EtOH, Methylbenzene, Petroleum ether, THF).

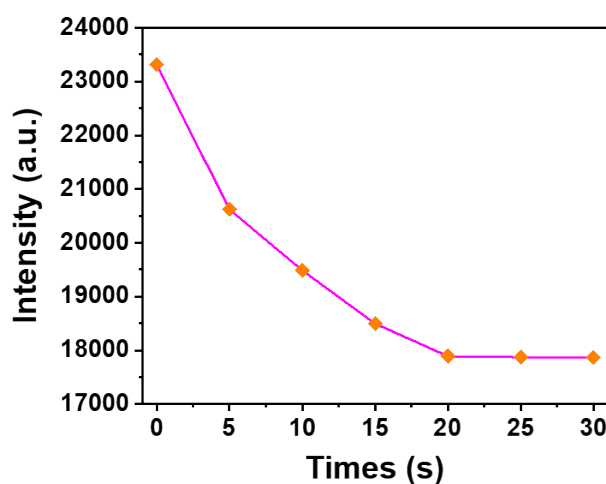

**Figure S11.** Time-dependent luminescence intensity of TtDFP at 500 nm in EtOH with 3.0 wt% water ( $\lambda_{\text{ex}} = 397$  nm).

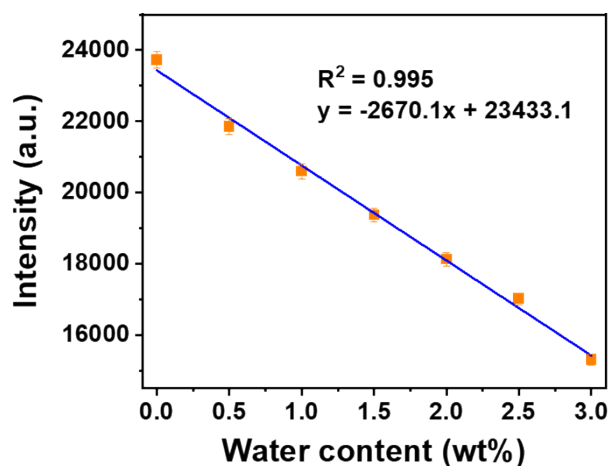

**Figure S12.** Calibration curves of TtDFP added water in EtOH with different content (0–3.0 wt %) ( $\lambda_{\text{ex}} = 397$  nm,  $\lambda_{\text{em}} = 500$  nm).

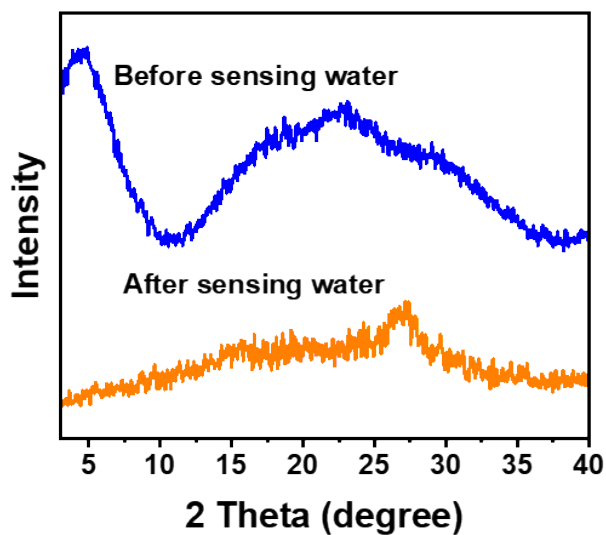

**Figure S13.** PXRD patterns of TtDFP before and after sensing water.

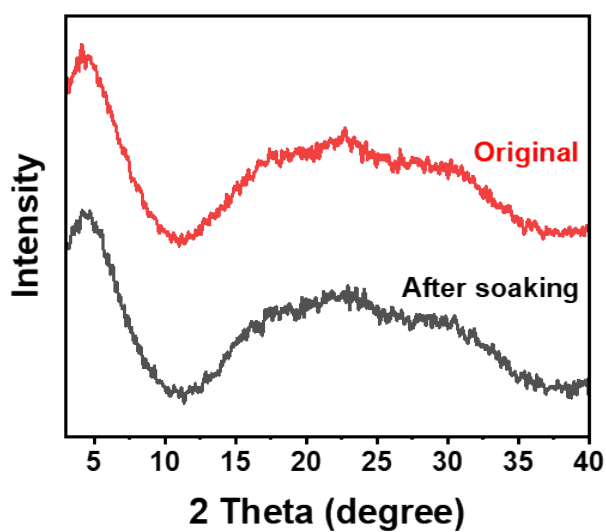

**Figure S14.** PXRD patterns of original TtDFP and after soaking TtDFP in EtOH for 48 h.

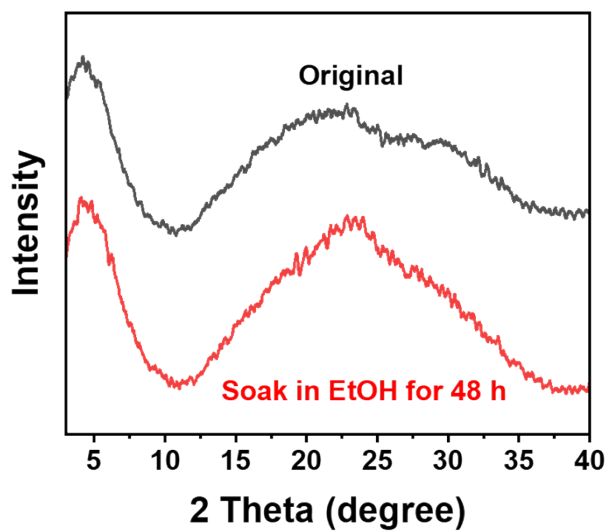

**Figure S15.** PXRD patterns of  $\text{Eu}^{3+}$ @TtDFP before and after soaking in EtOH for 48 h.

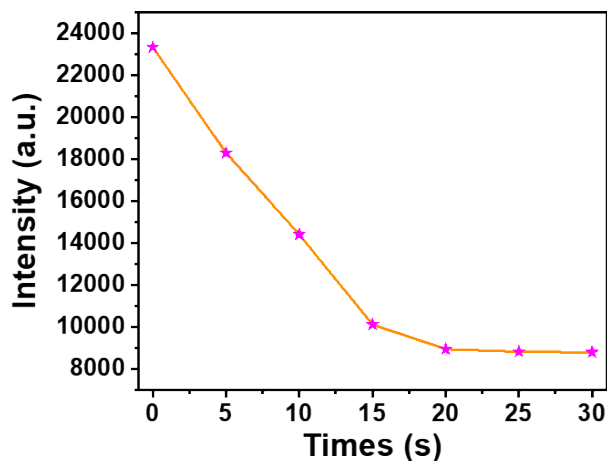

**Figure S16.** Time-dependent luminescence intensity of  $\text{Eu}^{3+}$ @TtDFP at 614 nm toward 25 ppm PhA vapor ( $\lambda_{\text{ex}} = 322$  nm).

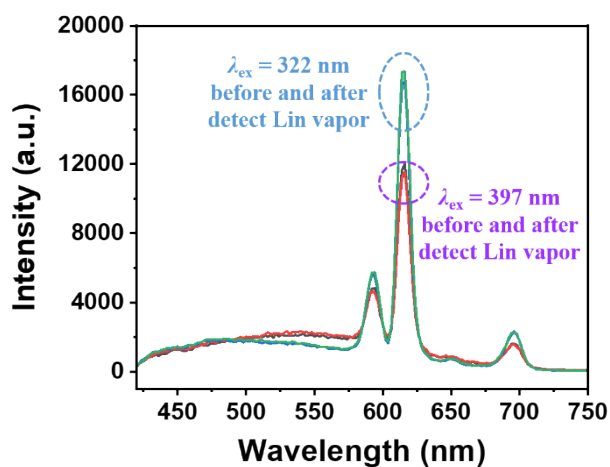

**Figure S17.** Luminescence spectra of  $\text{Eu}^{3+}$ @TtDFP detect 30 ppm Lin vapor with different excitation wavelengths.

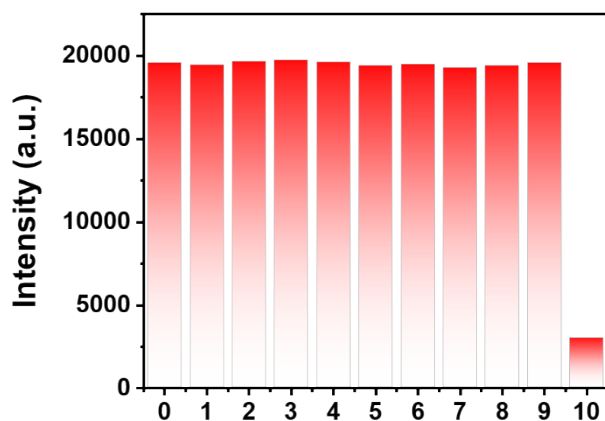

**Figure S18.** The histogram ( $I_{614}$ ) of  $\text{Eu}^{3+}$ @TtDFP EVA film dealt with different VOCs (0–10: Blank, formaldehyde, acetaldehyde, methylamine, ammonia, toluene, ethyl acetate, DCM, GA, Lin, PhA).

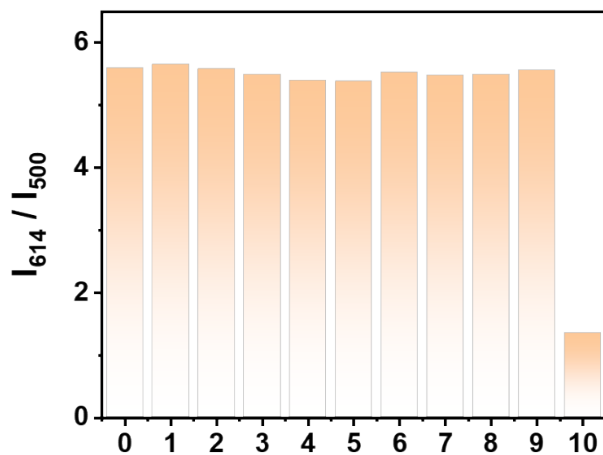

**Figure S19.** The histogram ( $I_{614}/I_{500}$ ) of  $\text{Eu}^{3+}$ @TtDFP EVA film dealt with different VOCs (0–10: Blank, formaldehyde, acetaldehyde, methylamine, ammonia, toluene, ethyl acetate, DCM, Lin, PhA, GA).

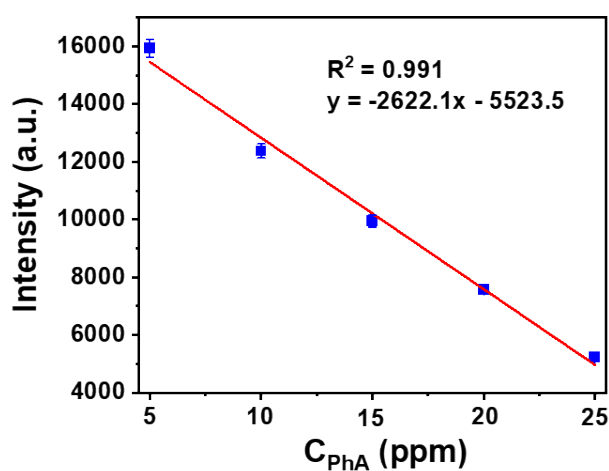

**Figure S20.** Calibration curves of  $\text{Eu}^{3+}$ @TtDFP sensing PhA vapor with different concentrations (5–25 ppm) ( $\lambda_{\text{ex}} = 322$  nm).

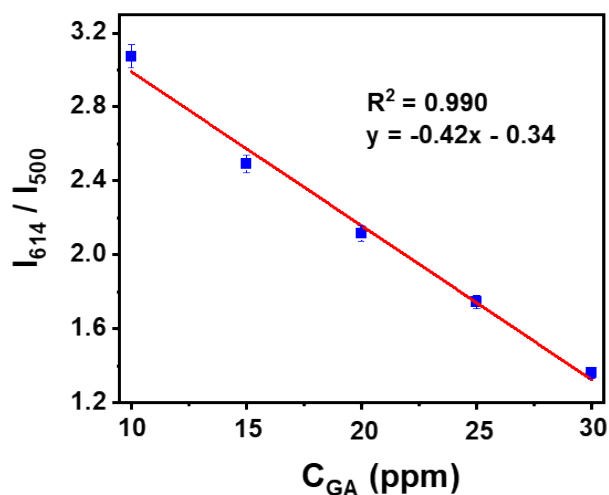

**Figure S21.** Calibration curves of  $\text{Eu}^{3+}$ @TtDFP sensing GA vapor with different concentrations (10–30 ppm) ( $\lambda_{\text{ex}} = 397$  nm).



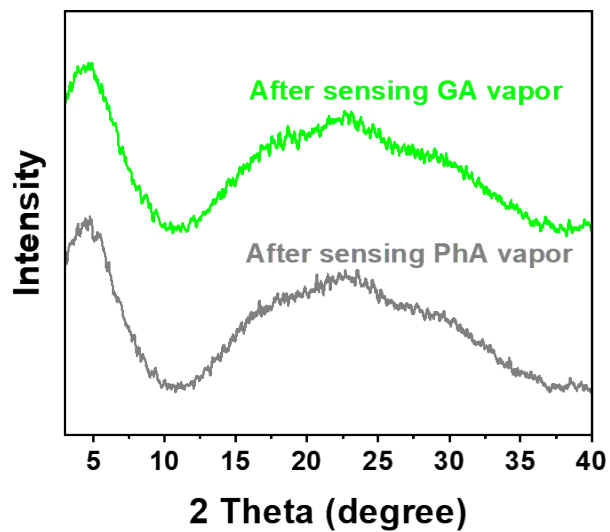

**Figure S22.** PXRD patterns of  $\text{Eu}^{3+}@\text{TtDFP}$  after sensing GA and PhA vapors.

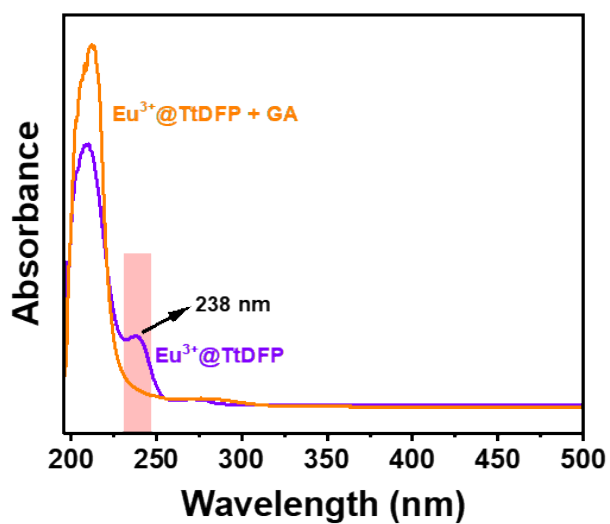

**Figure S23.** The UV-vis absorption spectra of  $\text{Eu}^{3+}@\text{TtDFP}$  before and after treatment of GA.
